# Supplementary material for: Characteristics of Phytoplankton Biomass, Primary Production and Community Structure in the Modaomen Channel, Pearl River Estuary, with Special Reference to the Influence of Saltwater Intrusion during Neap and Spring Tides
Source: PLoS One. 2016 Dec 1;11(12):e0167630. doi: 10.1371/journal.pone.0167630 (PMC5132311; doi:10.1371/journal.pone.0167630)
Supplement: S1 Table — (XLS) [file pone.0167630.s001.xls]

## Sheet: Sheet1
Station	cells/L	ST (Spring Tide)	W5	W5	W2	W2	W8	W8	NT (Neap Tide)	W5	W5	W2	W2	W8	W8
Layer			Surface	Bottom	Surface	Bottom	Surface	Bottom		Surface	Bottom	Surface	Bottom	Surface	Bottom
Sampling Time		26-27 Sep							19-20 Sep
Diatom															2000
Diatom (total)	cells/L		800	3600	126500	142300	900	2900		89800	27000	520900	216400	1800	1100
	Actinocyclus ellipticus var. ellipticus
	Actinoptychus annulatus			100						100
	Bacillaria paradoxa							500
	Biddulphia reticulata												100
	Chaetoceros lorenzianus
	Chaetoceros radicans						100	200							100
	Coscinodiscus granii										200	300	100
	Coscinodiscus jonesianus		200	100				400						100
	Coscinodiscus radiatus
	Coscinodiscus subtilis var. minorus		300	500	900	500	300	600		500	100	1200	900	300	100
	Coscinodiscus sp.			300	200	300	200	200		300	100	100	300
	Cyclotella striata var. striata		100		500	100		100		1200	400	1100	2400	100	200
	Cyclotella stylorum									100	300	100	300
	Cyclotella sp.														200
	Diploneis sp.
	Ditylim brightwellii
	Gyrosigma sp.			200
	Lauderia annulata													100
	Melosira granulata			2100	112800	125600		800		79200	21000	441200	187600
	Me. granulata var. angustissima				12000	15600				7800	4900	76600	24300
	Nitzschia sp.		200	200			100							100
	Skeletonema costatum													1100	400
	Synedra sp.			100		100						300			100
	Thalassiosira sp.				100	100	200	100		600			400
	Triceratium formosum f. quadrangularis
Dinoflagellate
伯氏角藻	Ceratium boehmii									0	0	0
低顶角藻	Ceratium humile									0	0	0
Dinoflagellate (total)	cells/L		1600	200	1200	300	400	700		1000	700	300	900	1400	900
	Alexandrium sp.		100		100		100				100
	Ceratium furca var. furca		200											800
	Gonyaulax polygramma									200
	Gonyaulax sp.											100	200	100	100
	Gymnodinium catenatum		900								400			200	300
	Gymnodinium sp.		100												100
	Gyrodinium sp.					100		100		100				100	100
	Prorocentrum lima						100	300		100
	Prorocentrum micans				100					100		100
	Prorocentrum ttiestinum		100		100	100	200	200			100		300
	Prorocentrum sp.		200	200	300	100		100		500	100	100	400	200	300
	Protoperidinium angustum				500
	Protoperidinium pellucidum
	Protoperidinium sp.				100
Cyanophyta
Cyanophyta (total)	cells/L		0	0	0	0	0	0		3000	0	0	0	0	0
	Spirulina sp.
	Trichodesmium erythraeum									3000
Chlorophyta
Chlorophyta (total)	cells/L		0	0	0	0	0	0		1500	0	4900	1500	0	0
	Pediastrum biradiatum
	Pediastrum duplex var. gracillimum											4900
	Pediastrum simples									1500
	Pediastrum tetras												1500
Euglenozoa
Euglenozoa (total)	cells/L		0	0	0	0	0	0		0	0	200	100	0	0
	Euglena sp.											200	100
